# Supplementary material for: Predictive value of plasmacytoid dendritic cells and Toll-like receptor-9 regarding the treatment efficacy of interferon-α in HBeAg-positive chronic hepatitis B patients
Source: PubMed Central journal article supplement — Exp Ther Med. 2019 Nov 1;18(6):4541–6. doi: 10.3892/etm.2019.8161 (PMC6878902; doi:10.3892/etm.2019.8161), 2019-11-01

Figure S1. The levels of (A) pDCs in liver and (B) TLR-9 in peripheral blood mononuclear cells are higher in normal controls than in HBeAg-positive chronic hepatitis B patients. \*P<0.05, compared with normal control. pDCs, plasmacytoid dendritic cells; TLR-9, Toll-like receptor 9; HBeAg, hepatitis B e antigen.

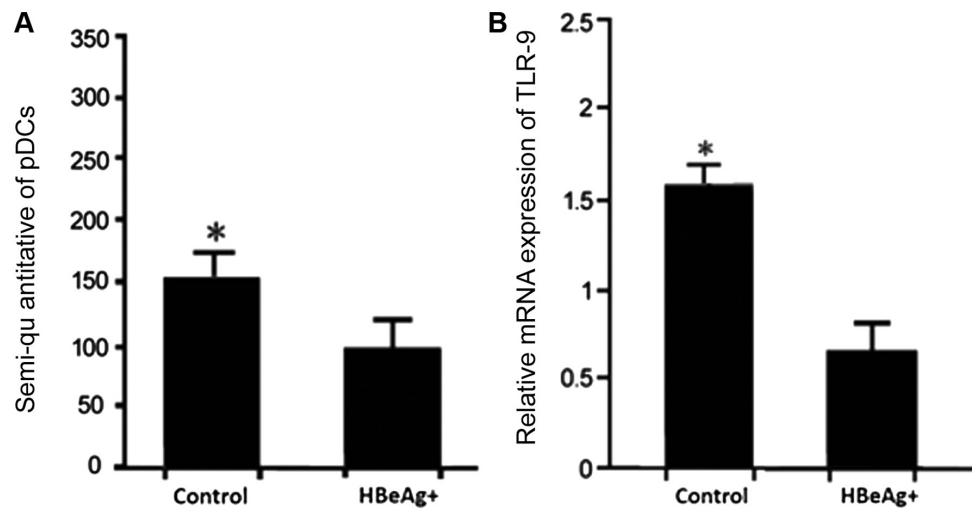

Figure S2. Expression of TLR9 in liver tissue detected by immunohistochemistry. The expression of TLR9 in the cytoplasm of epithelial cells of the response group was indicated with a black arrow (magnification, x10). TLR-9, Toll-like receptor 9.

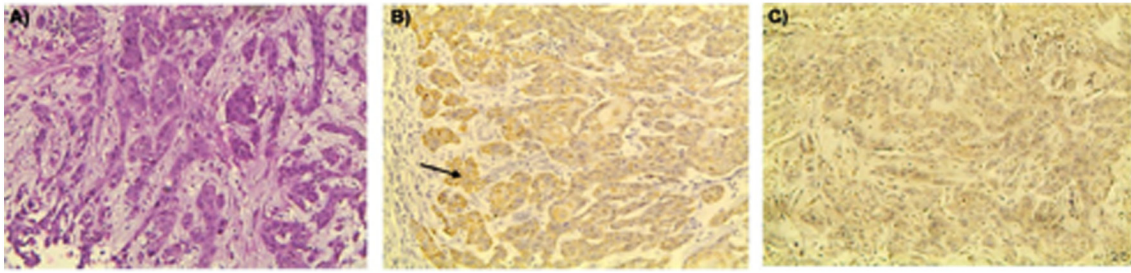

Supplement: Supplementary_Data.pdf [file Supplementary_Data.pdf]
